# Supplementary material for: Molecular identification of two Culex (Culex) species of the neotropical region (Diptera: Culicidae)
Source: PubMed Central journal article supplement (PMC5325596; doi:10.1371/journal.pone.0173052), 2017-02-24
Supplement: pone.0173052.s001.pdf [file pone.0173052.s001.pdf]

| Species            | Sample ID | Locality | Province | Latitude      | Longitude    | Collector | GenBank ND4 / COI |
|--------------------|-----------|----------|----------|---------------|--------------|-----------|-------------------|
| <i>C. bidens</i>   | Cat1257   | LP       | Cat      | 28°11'1.7"S   | 65°48'40.7"W | ML-WRA    | KY581210/KY581209 |
| <i>C. bidens</i>   | Cba1501   | Cba      | Cba      | 31°21'14.26"S | 64°06'7.49"W | ML-WRA    | KY581223/KY581211 |
| <i>C. bidens</i>   | Cba1506   | Cba      | Cba      | 31°21'14.26"S | 64°06'7.49"W | ML-WRA    | KY581224/KY581212 |
| <i>C. bidens</i>   | Cba1507*  | Cba      | Cba      | 31°21'14.26"S | 64°06'7.49"W | ML-WRA    | KY581225/KY581213 |
| <i>C. bidens</i>   | Cba1511   | Cba      | Cba      | 31°21'14.26"S | 64°06'7.49"W | ML-WRA    | KY581226/KY581214 |
| <i>C. bidens</i>   | Cba1514*  | Cba      | Cba      | 31°21'14.26"S | 64°06'7.49"W | ML-WRA    | KY581227/KY581215 |
| <i>C. bidens</i>   | Cba1515   | Cba      | Cba      | 31°21'14.26"S | 64°06'7.49"W | ML-WRA    | KY581228/KY581216 |
| <i>C. bidens</i>   | Cba1525   | Cba      | Cba      | 31°21'14.26"S | 64°06'7.49"W | ML-WRA    | KY581229/KY581217 |
| <i>C. bidens</i>   | Cba1526*  | Cba      | Cba      | 31°21'14.26"S | 64°06'7.49"W | ML-WRA    | KY581230/KY581218 |
| <i>C. bidens</i>   | Cba1532*  | Cba      | Cba      | 31°21'14.26"S | 64°06'7.49"W | ML-WRA    | KY581231/KY581219 |
| <i>C. bidens</i>   | Cba1539   | Cba      | Cba      | 31°21'14.26"S | 64°06'7.49"W | ML-WRA    | KY581232/KY581220 |
| <i>C. bidens</i>   | Cba1547*  | Cba      | Cba      | 31°21'14.26"S | 64°06'7.49"W | ML-WRA    | KY581233/KY581221 |
| <i>C. bidens</i>   | Cba1552   | Cba      | Cba      | 31°21'14.26"S | 64°06'7.49"W | ML-WRA    | KY581234/KY581222 |
| <i>C. bidens</i>   | Ju1508    | PV       | Ju       | 24°29'11.51"S | 64°58'5.50"W | MAL       | KY581236/KY581235 |
| <i>C. bidens</i>   | LR1502    | Cha      | LR       | 30°20'45.4"S  | 66°19'33.4"W | AMV-ML    | KY581240/KY581237 |
| <i>C. bidens</i>   | LR1506    | Cha      | LR       | 30°20'45.4"S  | 66°19'33.4"W | AMV-ML    | KY581241/KY581238 |
| <i>C. bidens</i>   | LR1524    | Cha      | LR       | 30°20'45.4"S  | 66°19'33.4"W | AMV-ML    | KY581242/KY581239 |
| <i>C. interfor</i> | Cat1202   | LP       | Cat      | 28°11'1.7"S   | 65°48'40.7"W | AMV-ML    | KY581249/KY581245 |
| <i>C. interfor</i> | Cat1236   | LP       | Cat      | 28°11'1.7"S   | 65°48'40.7"W | AMV-ML    | KY581250/KY581246 |
| <i>C. interfor</i> | Cat1240   | LP       | Cat      | 28°11'1.7"S   | 65°48'40.7"W | AMV-ML    | KY581251/KY581247 |
| <i>C. interfor</i> | Cat1256   | LP       | Cat      | 28°11'1.7"S   | 65°48'40.7"W | AMV-ML    | KY581252/KY581248 |
| <i>C. interfor</i> | Cba1505*  | Cba      | Cba      | 31°21'14.26"S | 64°06'7.49"W | ML-WRA    | KY581258/KY581253 |
| <i>C. interfor</i> | Cba1528   | Cba      | Cba      | 31°21'14.26"S | 64°06'7.49"W | ML-WRA    | KY581259/KY581254 |
| <i>C. interfor</i> | Cba1544   | Cba      | Cba      | 31°21'14.26"S | 64°06'7.49"W | ML-WRA    | KY581260/KY581255 |
| <i>C. interfor</i> | Cba1546   | Cba      | Cba      | 31°21'14.26"S | 64°06'7.49"W | ML-WRA    | KY581261/KY581256 |
| <i>C. interfor</i> | Cba1556   | Cba      | Cba      | 31°21'14.26"S | 64°06'7.49"W | ML-WRA    | KY581262/KY581257 |
| <i>C. interfor</i> | Cor1201   | NR12     | Cor      | 27°21'59.07"S | 58°16'58.9"W | ML        | KY581266/KY581263 |
| <i>C. interfor</i> | Cor1202   | NR12     | Cor      | 27°21'59.07"S | 58°16'58.9"W | ML        | KY581267/KY581264 |
| <i>C. interfor</i> | Cor1203   | NR12     | Cor      | 27°21'59.07"S | 58°16'58.9"W | ML        | KY581268/KY581265 |
| <i>C. interfor</i> | LR1501    | Cha      | LR       | 30°20'45.4"S  | 66°19'33.4"W | AMV-ML    | KY581274/KY581269 |
| <i>C. interfor</i> | LR1505    | Cha      | LR       | 30°20'45.4"S  | 66°19'33.4"W | AMV-ML    | KY581275/KY581270 |
| <i>C. interfor</i> | LR1522    | Cha      | LR       | 30°20'45.4"S  | 66°19'33.4"W | AMV-ML    | KY581276/KY581271 |
| <i>C. interfor</i> | LR1523    | Cha      | LR       | 30°20'45.4"S  | 66°19'33.4"W | AMV-ML    | KY581277/KY581272 |
| <i>C. interfor</i> | LR1530    | Cha      | LR       | 30°20'45.4"S  | 66°19'33.4"W | AMV-ML    | KY581278/KY581273 |

AMV: AM Visintín; Cat: Catamarca; Cba: Córdoba; Cha: Chamental; Cor: Corrientes; MAL:

MA Linares; Ju: Jujuy; LP: La Puerta; LR: La Rioja; ML: M Laurito; NR12: National Route 12;

PV: Puesto Viejo; WRA: WR Almirón.

\*: morphologically intermediate specimens.
