# Supplementary material for: Molecular identification of two Culex (Culex) species of the neotropical region (Diptera: Culicidae)
Source: PubMed Central journal article supplement (PMC5325596; doi:10.1371/journal.pone.0173052), 2017-02-24
Supplement: pone.0173052.s002.pdf [file pone.0173052.s002.pdf]

| Sample                      | Locus |    |      |     |      |     |
|-----------------------------|-------|----|------|-----|------|-----|
|                             | GT51  |    | CQ41 |     | CQ11 |     |
| <i>C. bidens</i> Ju1508     | 88    | 90 | 168  | 168 | 184  | 184 |
| <i>C. bidens</i> Cat1257    | 88    | 88 | 168  | 168 | 154  | 202 |
| <i>C. interfor</i> Cat1202  | 90    | 90 | 166  | 166 | 202  | 202 |
| <i>C. interfor</i> Cat1236  | 88    | 88 | 164  | 166 | --   | --  |
| <i>C. interfor</i> Cat1240  | --    | -- | 164  | 164 | 126  | 158 |
| <i>C. interfor</i> Cat1256  | 88    | 88 | 166  | 166 | 158  | 158 |
| <i>C. bidens</i> Cba1501    | 90    | 90 | 166  | 166 | --   | --  |
| <i>C. bidens</i> Cba1506    | --    | -- | 166  | 166 | 148  | 148 |
| <i>C. bidens</i> Cba1515    | 88    | 90 | 162  | 168 | 148  | 148 |
| <i>C. bidens</i> Cba1525    | 88    | 90 | 164  | 168 | 82   | 82  |
| <i>C. bidens</i> Cba1539    | 90    | 90 | 166  | 166 | 148  | 148 |
| <i>C. bidens</i> Cba1552    | 88    | 90 | 168  | 174 | 148  | 148 |
| <i>C. bidens</i> Cba1511    | 88    | 90 | 168  | 168 | 124  | 176 |
| <i>C. bidens</i> Cba1507*   | 90    | 90 | 168  | 168 | 124  | 124 |
| <i>C. bidens</i> Cba1526*   | 88    | 90 | 174  | 174 | --   | --  |
| <i>C. bidens</i> - ba1532*  | 88    | 90 | 168  | 168 | 148  | 148 |
| <i>C. bidens</i> Cba1547*   | 88    | 90 | 174  | 174 | 148  | 148 |
| <i>C. bidens</i> Cba1514*   | 88    | 90 | 166  | 166 | 124  | 208 |
| <i>C. interfor</i> Cba1505* | 88    | 88 | 162  | 162 | 176  | 176 |
| <i>C. interfor</i> Cba1528  | 88    | 88 | 164  | 164 | 148  | 148 |
| <i>C. interfor</i> Cba1544  | 88    | 88 | 164  | 174 | 148  | 148 |
| <i>C. interfor</i> Cba1546  | 88    | 88 | 164  | 174 | 124  | 148 |
| <i>C. interfo</i> -Cba1556  | 88    | 88 | 162  | 168 | 202  | 202 |
| <i>C. interfor</i> Cor1201  | 88    | 88 | 162  | 168 | --   | --  |
| <i>C. interfor</i> Cor1202  | 90    | 90 | 162  | 164 | 158  | 158 |
| <i>C. interfor</i> Cor1203  | 88    | 88 | 162  | 162 | 202  | 202 |
| <i>C. bidens</i> LR1502     | 90    | 90 | 168  | 168 | 148  | 208 |
| <i>C. bidens</i> LR1506     | 90    | 90 | 168  | 174 | 148  | 148 |
| <i>C. bidens</i> LR1524     | 88    | 90 | 168  | 168 | 124  | 148 |
| <i>C. interfor</i> LR1501   | 88    | 88 | 164  | 174 | 148  | 148 |
| <i>C. interfor</i> LR1505   | 88    | 88 | 164  | 164 | 124  | 148 |
| <i>C. interfor</i> LR1522   | 88    | 88 | 164  | 164 | --   | --  |
| <i>C. interfor</i> LR1523   | 88    | 88 | 164  | 164 | 148  | 148 |
| <i>C. interfor</i> LR1530   | 88    | 88 | 166  | 168 | --   | --  |

--: missing data
