# Supplementary material for: Molecular identification of two Culex (Culex) species of the neotropical region (Diptera: Culicidae)
Source: PubMed Central journal article supplement (PMC5325596; doi:10.1371/journal.pone.0173052), 2017-02-24
Supplement: pone.0173052.s003.pdf [file pone.0173052.s003.pdf]

|                               |      |      |      |      |      |      |      |      |      |      |      |      |      |      |      |      |      |      |
|-------------------------------|------|------|------|------|------|------|------|------|------|------|------|------|------|------|------|------|------|------|
|                               | 1    | 2    | 3    | 4    | 5    | 6    | 7    | 8    | 9    | 10   | 11   | 12   | 13   | 14   | 15   | 16   | 17   | 18   |
| 1.C. <i>bidens</i> Ju1508     |      |      |      |      |      |      |      |      |      |      |      |      |      |      |      |      |      |      |
| 2.C. <i>bidens</i> Cat1257    | 0.20 |      |      |      |      |      |      |      |      |      |      |      |      |      |      |      |      |      |
| 3.C. <i>bidens</i> Cba1501    | 0.51 | 0.30 |      |      |      |      |      |      |      |      |      |      |      |      |      |      |      |      |
| 4.C. <i>bidens</i> Cba1506    | 0.20 | 0.20 | 0.51 |      |      |      |      |      |      |      |      |      |      |      |      |      |      |      |
| 5.C. <i>bidens</i> Cba1507    | 0.10 | 0.10 | 0.40 | 0.10 |      |      |      |      |      |      |      |      |      |      |      |      |      |      |
| 6.C. <i>bidens</i> Cba1511    | 0.20 | 0.20 | 0.30 | 0.20 | 0.10 |      |      |      |      |      |      |      |      |      |      |      |      |      |
| 7.C. <i>bidens</i> Cba1514    | 0.71 | 0.51 | 0.20 | 0.71 | 0.61 | 0.51 |      |      |      |      |      |      |      |      |      |      |      |      |
| 8.C. <i>bidens</i> Cba1515    | 0.10 | 0.10 | 0.40 | 0.10 | 0.00 | 0.10 | 0.61 |      |      |      |      |      |      |      |      |      |      |      |
| 9.C. <i>bidens</i> Cba1525    | 0.40 | 0.40 | 0.71 | 0.40 | 0.30 | 0.40 | 0.91 | 0.30 |      |      |      |      |      |      |      |      |      |      |
| 10.C. <i>bidens</i> Cba1526   | 0.30 | 0.30 | 0.61 | 0.30 | 0.20 | 0.30 | 0.81 | 0.20 | 0.10 |      |      |      |      |      |      |      |      |      |
| 11.C. <i>bidens</i> Cba1532   | 0.20 | 0.20 | 0.51 | 0.00 | 0.10 | 0.20 | 0.71 | 0.10 | 0.40 | 0.30 |      |      |      |      |      |      |      |      |
| 12.C. <i>bidens</i> Cba1539   | 0.20 | 0.20 | 0.51 | 0.00 | 0.10 | 0.20 | 0.71 | 0.10 | 0.40 | 0.30 | 0.00 |      |      |      |      |      |      |      |
| 13.C. <i>bidens</i> Cba1547   | 0.30 | 0.30 | 0.61 | 0.30 | 0.20 | 0.30 | 0.81 | 0.20 | 0.10 | 0.00 | 0.30 | 0.30 |      |      |      |      |      |      |
| 14.C. <i>bidens</i> Cba1552   | 0.40 | 0.40 | 0.71 | 0.40 | 0.30 | 0.40 | 0.91 | 0.30 | 0.00 | 0.10 | 0.40 | 0.40 | 0.10 |      |      |      |      |      |
| 15.C. <i>bidens</i> LR1502    | 0.20 | 0.20 | 0.51 | 0.00 | 0.10 | 0.20 | 0.71 | 0.10 | 0.40 | 0.30 | 0.00 | 0.00 | 0.30 | 0.40 |      |      |      |      |
| 16.C. <i>bidens</i> LRI1506   | 0.20 | 0.20 | 0.51 | 0.00 | 0.10 | 0.20 | 0.71 | 0.10 | 0.40 | 0.30 | 0.00 | 0.00 | 0.30 | 0.40 | 0.00 |      |      |      |
| 17.C. <i>bidens</i> LR1524    | 0.10 | 0.10 | 0.40 | 0.10 | 0.00 | 0.10 | 0.61 | 0.00 | 0.30 | 0.20 | 0.10 | 0.10 | 0.20 | 0.30 | 0.10 | 0.10 |      |      |
| 18.C. <i>interfor</i> Cat1202 | 2.36 | 2.25 | 2.15 | 2.36 | 2.25 | 2.15 | 2.15 | 2.25 | 2.46 | 2.46 | 2.36 | 2.36 | 2.46 | 2.46 | 2.36 | 2.36 | 2.25 |      |
| 19.C. <i>interfor</i> Cat1236 | 2.25 | 2.15 | 2.04 | 2.25 | 2.15 | 2.04 | 2.04 | 2.15 | 2.36 | 2.36 | 2.25 | 2.25 | 2.36 | 2.36 | 2.25 | 2.25 | 2.15 | 0.10 |
| 20.C. <i>interfor</i> Cat1240 | 2.25 | 2.15 | 2.04 | 2.25 | 2.15 | 2.04 | 2.04 | 2.15 | 2.36 | 2.36 | 2.25 | 2.25 | 2.36 | 2.36 | 2.25 | 2.25 | 2.15 | 0.10 |
| 21.C. <i>interfor</i> Cat1256 | 2.36 | 2.25 | 2.15 | 2.36 | 2.25 | 2.15 | 2.15 | 2.25 | 2.46 | 2.46 | 2.36 | 2.36 | 2.46 | 2.46 | 2.36 | 2.36 | 2.25 | 0.00 |
| 22.C. <i>interfor</i> Cba1505 | 2.15 | 2.04 | 1.94 | 2.15 | 2.04 | 1.94 | 1.94 | 2.04 | 2.25 | 2.25 | 2.15 | 2.15 | 2.25 | 2.25 | 2.15 | 2.15 | 2.04 | 0.20 |
| 23.C. <i>interfor</i> Cba1528 | 2.36 | 2.25 | 2.15 | 2.36 | 2.25 | 2.15 | 2.15 | 2.25 | 2.46 | 2.46 | 2.36 | 2.36 | 2.46 | 2.46 | 2.36 | 2.36 | 2.25 | 0.20 |
| 24.C. <i>interfor</i> Cba1544 | 2.36 | 2.25 | 2.15 | 2.36 | 2.25 | 2.15 | 2.15 | 2.25 | 2.46 | 2.46 | 2.36 | 2.36 | 2.46 | 2.46 | 2.36 | 2.36 | 2.25 | 0.20 |
| 25.C. <i>interfor</i> Cba1546 | 2.46 | 2.36 | 2.25 | 2.46 | 2.36 | 2.25 | 2.25 | 2.36 | 2.56 | 2.56 | 2.46 | 2.46 | 2.56 | 2.56 | 2.46 | 2.46 | 2.36 | 0.10 |
| 26.C. <i>interfor</i> Cba1556 | 2.15 | 2.04 | 1.94 | 2.15 | 2.04 | 1.94 | 1.94 | 2.04 | 2.25 | 2.25 | 2.15 | 2.15 | 2.25 | 2.25 | 2.15 | 2.15 | 2.04 | 0.20 |
| 27.C. <i>interfor</i> Cor1201 | 2.36 | 2.25 | 2.15 | 2.36 | 2.25 | 2.15 | 2.15 | 2.25 | 2.46 | 2.46 | 2.36 | 2.36 | 2.46 | 2.46 | 2.36 | 2.36 | 2.25 | 0.00 |
| 28.C. <i>interfor</i> Cor1202 | 2.36 | 2.25 | 2.15 | 2.36 | 2.25 | 2.15 | 2.15 | 2.25 | 2.46 | 2.46 | 2.36 | 2.36 | 2.46 | 2.46 | 2.36 | 2.36 | 2.25 | 0.00 |
| 29.C. <i>interfor</i> Cor1203 | 2.36 | 2.25 | 2.15 | 2.36 | 2.25 | 2.15 | 2.15 | 2.25 | 2.46 | 2.46 | 2.36 | 2.36 | 2.46 | 2.46 | 2.36 | 2.36 | 2.25 | 0.20 |
| 30.C. <i>interfor</i> LR1501  | 2.25 | 2.15 | 2.04 | 2.25 | 2.15 | 2.04 | 2.04 | 2.15 | 2.35 | 2.35 | 2.25 | 2.25 | 2.35 | 2.35 | 2.25 | 2.25 | 2.15 | 0.20 |
| 31.C. <i>interfor</i> LR1505  | 2.36 | 2.25 | 2.15 | 2.36 | 2.25 | 2.15 | 2.15 | 2.25 | 2.46 | 2.46 | 2.36 | 2.36 | 2.46 | 2.46 | 2.36 | 2.36 | 2.25 | 0.00 |
| 32.C. <i>interfor</i> LR1522  | 2.36 | 2.25 | 2.15 | 2.36 | 2.25 | 2.15 | 2.15 | 2.25 | 2.46 | 2.46 | 2.36 | 2.36 | 2.46 | 2.46 | 2.36 | 2.36 | 2.25 | 0.00 |
| 33.C. <i>interfor</i> LR1523  | 2.25 | 2.15 | 2.04 | 2.25 | 2.15 | 2.04 | 2.04 | 2.15 | 2.36 | 2.36 | 2.25 | 2.25 | 2.36 | 2.36 | 2.25 | 2.25 | 2.15 | 0.10 |
| 34.C. <i>interfor</i> LR1530  | 2.36 | 2.25 | 2.15 | 2.36 | 2.25 | 2.15 | 2.15 | 2.25 | 2.46 | 2.46 | 2.36 | 2.36 | 2.46 | 2.46 | 2.36 | 2.36 | 2.25 | 0.00 |

|                               |      |      |      |      |      |      |      |      |      |      |      |      |      |      |      |      |
|-------------------------------|------|------|------|------|------|------|------|------|------|------|------|------|------|------|------|------|
|                               | 19   | 20   | 21   | 22   | 23   | 24   | 25   | 26   | 27   | 28   | 29   | 30   | 31   | 32   | 33   | 34   |
| 19.C. <i>interfor</i> Cat1236 | 0.20 |      |      |      |      |      |      |      |      |      |      |      |      |      |      |      |
| 20.C. <i>interfor</i> Cat1240 | 0.20 | 0.00 |      |      |      |      |      |      |      |      |      |      |      |      |      |      |
| 21.C. <i>interfor</i> Cat1256 | 0.10 | 0.10 | 0.10 |      |      |      |      |      |      |      |      |      |      |      |      |      |
| 22.C. <i>interfor</i> Cba1505 | 0.30 | 0.30 | 0.30 | 0.20 |      |      |      |      |      |      |      |      |      |      |      |      |
| 23.C. <i>interfor</i> Cba1528 | 0.30 | 0.30 | 0.30 | 0.20 | 0.20 |      |      |      |      |      |      |      |      |      |      |      |
| 24.C. <i>interfor</i> Cba1544 | 0.30 | 0.30 | 0.30 | 0.20 | 0.20 | 0.00 |      |      |      |      |      |      |      |      |      |      |
| 25.C. <i>interfor</i> Cba1546 | 0.20 | 0.20 | 0.20 | 0.10 | 0.30 | 0.30 | 0.30 |      |      |      |      |      |      |      |      |      |
| 26.C. <i>interfor</i> Cba1556 | 0.30 | 0.30 | 0.30 | 0.20 | 0.00 | 0.20 | 0.20 | 0.30 |      |      |      |      |      |      |      |      |
| 27.C. <i>interfor</i> Cor1201 | 0.10 | 0.10 | 0.10 | 0.00 | 0.20 | 0.20 | 0.20 | 0.10 | 0.20 |      |      |      |      |      |      |      |
| 28.C. <i>interfor</i> Cor1202 | 0.10 | 0.10 | 0.10 | 0.00 | 0.20 | 0.20 | 0.20 | 0.10 | 0.20 | 0.00 |      |      |      |      |      |      |
| 29.C. <i>interfor</i> Cor1203 | 0.30 | 0.30 | 0.30 | 0.20 | 0.20 | 0.20 | 0.20 | 0.30 | 0.20 | 0.20 | 0.20 |      |      |      |      |      |
| 30.C. <i>interfor</i> LR1501  | 0.20 | 0.10 | 0.20 | 0.30 | 0.30 | 0.30 | 0.30 | 0.30 | 0.30 | 0.20 | 0.20 | 0.30 |      |      |      |      |
| 31.C. <i>interfor</i> LR1505  | 0.10 | 0.10 | 0.10 | 0.00 | 0.20 | 0.20 | 0.20 | 0.10 | 0.20 | 0.00 | 0.00 | 0.20 | 0.20 |      |      |      |
| 32.C. <i>interfor</i> LR1522  | 0.10 | 0.10 | 0.10 | 0.00 | 0.20 | 0.20 | 0.20 | 0.10 | 0.20 | 0.00 | 0.00 | 0.20 | 0.20 | 0.00 |      |      |
| 33.C. <i>interfor</i> LR1523  | 0.20 | 0.20 | 0.20 | 0.10 | 0.10 | 0.10 | 0.10 | 0.20 | 0.10 | 0.10 | 0.10 | 0.10 | 0.20 | 0.10 | 0.10 |      |
| 34.C. <i>interfor</i> LR1530  | 0.10 | 0.10 | 0.10 | 0.00 | 0.20 | 0.20 | 0.20 | 0.10 | 0.20 | 0.00 | 0.00 | 0.20 | 0.20 | 0.00 | 0.00 | 0.10 |
