# Supplementary material for: Molecular identification of two Culex (Culex) species of the neotropical region (Diptera: Culicidae)
Source: PubMed Central journal article supplement (PMC5325596; doi:10.1371/journal.pone.0173052), 2017-02-24
Supplement: pone.0173052.s004.pdf [file pone.0173052.s004.pdf]

| Query                      | Identification             |
|----------------------------|----------------------------|
| <i>C. bidens</i> Cat1257   | <i>C. bidens</i> Cba1501   |
| <i>C. bidens</i> Cba1501   | <i>C. bidens</i> Cba1514   |
| <i>C. bidens</i> Cba1506   | <i>C. bidens</i> Cba1532   |
| <i>C. bidens</i> Cba1507   | <i>C. bidens</i> LR1534    |
| <i>C. bidens</i> Cba1511   | <i>C. bidens</i> Cba1507   |
| <i>C. bidens</i> Cba1514   | <i>C. bidens</i> Cba1501   |
| <i>C. bidens</i> Cba1515   | <i>C. bidens</i> Cba1507   |
| <i>C. bidens</i> Cba1525   | <i>C. bidens</i> Cba1552   |
| <i>C. bidens</i> Cba1526   | <i>C. bidens</i> Cba1547   |
| <i>C. bidens</i> Cba1532   | <i>C. bidens</i> Cba1506   |
| <i>C. bidens</i> Cba1539   | <i>C. bidens</i> Cba1506   |
| <i>C. bidens</i> Cba1547   | <i>C. bidens</i> Cba1526   |
| <i>C. bidens</i> Cba1552   | <i>C. bidens</i> Cba1525   |
| <i>C. bidens</i> Ju1508    | <i>C. bidens</i> Cba1507   |
| <i>C. bidens</i> LR1502    | <i>C. bidens</i> Cba1506   |
| <i>C. bidens</i> LR1506    | <i>C. bidens</i> Cba1506   |
| <i>C. bidens</i> LR1524    | <i>C. bidens</i> Cba1507   |
| <i>C. interfor</i> Cat1202 | <i>C. interfor</i> Cat1256 |
| <i>C. interfor</i> Cat1236 | <i>C. interfor</i> Cat1240 |
| <i>C. interfor</i> Cat1240 | <i>C. interfor</i> Cat1236 |
| <i>C. interfor</i> Cat1256 | <i>C. interfor</i> Cor1201 |
| <i>C. interfor</i> Cba1505 | <i>C. interfor</i> Cba1556 |
| <i>C. interfor</i> Cba1528 | <i>C. interfor</i> Cba1544 |
| <i>C. interfor</i> Cba1544 | <i>C. interfor</i> Cba1528 |
| <i>C. interfor</i> Cba1546 | <i>C. interfor</i> Cat1256 |
| <i>C. interfor</i> Cba1556 | <i>C. interfor</i> Cba1505 |
| <i>C. interfor</i> Cor1201 | <i>C. interfor</i> Cat1256 |
| <i>C. interfor</i> Cor1202 | <i>C. interfor</i> Cat1256 |
| <i>C. interfor</i> Cor1203 | <i>C. interfor</i> Cat1256 |
| <i>C. interfor</i> LR1501  | <i>C. interfor</i> Cat1236 |
| <i>C. interfor</i> LR1505  | <i>C. interfor</i> Cat1256 |
| <i>C. interfor</i> LR1522  | <i>C. interfor</i> Cat1256 |
| <i>C. interfor</i> LR1523  | <i>C. interfor</i> Cat1256 |
| <i>C. interfor</i> LR1530  | <i>C. interfor</i> Cat1256 |
